# Supplementary material for: The Tip of the Tail Needle Affects the Rate of DNA Delivery by Bacteriophage P22
Source: PubMed Central journal article supplement (PMC3741392; doi:10.1371/journal.pone.0070936), 2013-08-12
Supplement: pone.0070936.s003.pdf [file pone.0070936.s003.pdf]

|                 |                                       |
|-----------------|---------------------------------------|
| Flex2017B       | -----                                 |
| Flex2457        | -----                                 |
| Flex301         | -----                                 |
| FlexK-304       | -----                                 |
| FlexK-671       | -----                                 |
| Flex2930-71     | -----                                 |
| Flex2747-71     | -----                                 |
| E1520-1         | -----                                 |
| B354-1          | -----                                 |
| B7A1            | -----                                 |
| Boyd-1          | -----                                 |
| Ferg3           | -----                                 |
| Flex2017        | -----                                 |
| 9570-1          | -----                                 |
| Dec12B          | -----                                 |
| 9574-1          | -----                                 |
| W-1             | -----                                 |
| K011-1          | -----                                 |
| H494-1          | -----                                 |
| 1632-1          | -----                                 |
| B088-1          | -----                                 |
| 522-1           | -----                                 |
| 2534-1          | -----                                 |
| FlexK-404       | -----                                 |
| Eco82-1         | -----                                 |
| UMNK-1          | -----                                 |
| CUMT8           | -----                                 |
| 2741-1          | -----                                 |
| LB22-1          | -----                                 |
| 2071-1          | -----                                 |
| 3493-1          | -----                                 |
| 7901-1          | -----                                 |
| 8351-1          | -----                                 |
| C227-1          | -----                                 |
| C236-1          | -----                                 |
| 9591-1          | -----                                 |
| 4404-1          | -----                                 |
| 4522-1          | -----                                 |
| 3677-1          | -----                                 |
| 4623-1          | -----                                 |
| C1-1            | -----                                 |
| C2-1            | -----                                 |
| C3-1            | -----                                 |
| C4-1            | -----                                 |
| C5-1            | -----                                 |
| Dec12D          | -----                                 |
| Sf6             | -----*                                |
| EC4113          | -----                                 |
| STEC94C-1       | -----                                 |
| Ferg2           | -----                                 |
| TA271-1         | -----                                 |
| Eco989-1        | -----                                 |
| Ferg1           | -----*                                |
| HS1             | -----                                 |
| M863-1          | -----                                 |
| E1167-1         | -----                                 |
| Dec10C-1        | -----                                 |
| Dec10D-1        | -----                                 |
| Dec10B-1        | -----                                 |
| Dec9E-1         | -----                                 |
| Dec9D-1         | -----                                 |
| Dec9C-1         | -----                                 |
| Dec9B-1         | -----                                 |
| 105-1           | -----                                 |
| Dec9A-1         | -----                                 |
| P18             | -----                                 |
| 30-1            | -----                                 |
| 9952            | -----                                 |
| EC1865          | -----                                 |
| 1629-1          | -----                                 |
| 224-1           | -----                                 |
| 26-1            | -----                                 |
| 21-1            | -----                                 |
| 9942-1          | -----                                 |
| Flex8401        | -----                                 |
| FlexM90T        | -----                                 |
| phage31         | MILNPKAVLNNTSSGSSGVSSFNRI             |
| 44RR2-8torf183  | GPVDEPSGDYTDAMVNAIEKAPTDSQRRVLIGTT 60 |
| CMB120orf226    | MILNPKAVLNNTSSGSSGVSSFNRI             |
| phiHS19         | GPVDEPSGDYTDAMVNAIEKAPTDSQRRVLIGTT 60 |
| STML-13-1       | -----                                 |
| PhaxI           | -----                                 |
| Vi01            | -----                                 |
| SFP10           | -----                                 |
| Limestone1      | -----                                 |
| AeromonasSUU    | -----                                 |
| RB43            | -----MLISA 5                          |
| VibrioO395-1174 | -----                                 |
| VibrioO395-1257 | -----                                 |
| VibrioRC27      | -----                                 |
| VibrioTMA21     | -----                                 |
| VibrioTM11079   | -----                                 |
| VibrioTM2740    | -----                                 |
| VibrioI2129     | -----                                 |
| VirbiroSX-4     | -----                                 |

|                 |                                                              |         |
|-----------------|--------------------------------------------------------------|---------|
| Flex2017B       | -----                                                        |         |
| Flex2457        | -----                                                        |         |
| Flex301         | -----                                                        |         |
| FlexK-304       | -----                                                        |         |
| FlexK-671       | -----                                                        |         |
| Flex2930-71     | -----                                                        |         |
| Flex2747-71     | -----                                                        |         |
| E1520-1         | -----                                                        |         |
| B354-1          | -----                                                        |         |
| B7A1            | -----                                                        |         |
| Boyd-1          | -----                                                        |         |
| Ferg3           | -----                                                        |         |
| Flex2017        | -----                                                        |         |
| 9570-1          | -----                                                        |         |
| Dec12B          | -----                                                        |         |
| 9574-1          | -----                                                        |         |
| W-1             | -----                                                        |         |
| K011-1          | -----                                                        |         |
| H494-1          | -----                                                        |         |
| 1632-1          | -----                                                        |         |
| B088-1          | -----                                                        |         |
| 522-1           | -----                                                        |         |
| 2534-1          | -----                                                        |         |
| FlexK-404       | -----                                                        |         |
| Eco82-1         | -----                                                        |         |
| UMNK-1          | -----                                                        |         |
| CUMT8           | -----                                                        |         |
| 2741-1          | -----                                                        |         |
| LB22-1          | -----                                                        |         |
| 2071-1          | -----                                                        |         |
| 3493-1          | -----                                                        |         |
| 7901-1          | -----                                                        |         |
| 8351-1          | -----                                                        |         |
| C227-1          | -----                                                        |         |
| C236-1          | -----                                                        |         |
| 9591-1          | -----                                                        |         |
| 4404-1          | -----                                                        |         |
| 4522-1          | -----                                                        |         |
| 3677-1          | -----                                                        |         |
| 4623-1          | -----                                                        |         |
| C1-1            | -----                                                        |         |
| C2-1            | -----                                                        |         |
| C3-1            | -----                                                        |         |
| C4-1            | -----                                                        |         |
| C5-1            | -----                                                        |         |
| Dec12D          | -----                                                        |         |
| Sf6             | -----                                                        |         |
| EC4113          | -----                                                        | *       |
| STEC94C-1       | -----                                                        |         |
| Ferg2           | -----                                                        |         |
| TA271-1         | -----                                                        |         |
| Eco989-1        | -----                                                        |         |
| Ferg1           | -----                                                        |         |
| HS1             | -----                                                        | *       |
| M863-1          | -----                                                        |         |
| E1167-1         | -----                                                        |         |
| Dec10C-1        | -----                                                        |         |
| Dec10D-1        | -----                                                        |         |
| Dec10B-1        | -----                                                        |         |
| Dec9E-1         | -----                                                        |         |
| Dec9D-1         | -----                                                        |         |
| Dec9C-1         | -----                                                        |         |
| Dec9B-1         | -----                                                        |         |
| 105-1           | -----                                                        |         |
| Dec9A-1         | -----                                                        |         |
| P18             | -----                                                        |         |
| 30-1            | -----                                                        |         |
| 9952            | -----                                                        |         |
| EC1865          | -----                                                        |         |
| 1629-1          | -----                                                        |         |
| 224-1           | -----                                                        |         |
| 26-1            | -----                                                        |         |
| 21-1            | -----                                                        |         |
| 9942-1          | -----                                                        |         |
| Flex8401        | -----                                                        |         |
| FlexM90T        | -----                                                        |         |
| phage31         | PTVEELIDPVTVDNLTSDSSNSALSARQGKLLQDGKQPTITGAASTIASVDLTPVRIAA  | 120     |
| 44RR2-8torf183  | PTVEELIDPITVVDNLTSDSSNSALSARQGKLLQDGKQPTITGAASTIASVDLTPVRIAA | 120     |
| CMB120orf226    | -----                                                        |         |
| phiHS19         | -----                                                        | MAILT 5 |
| STML-13-1       | -----                                                        |         |
| PhaxI           | -----                                                        | MAILT 5 |
| Vi01            | -----                                                        | MAILT 5 |
| SFP10           | -----                                                        | MAILT 5 |
| Limestone1      | -----                                                        | MAILP 5 |
| AeromonasSUU    | -----                                                        | MPF 3   |
| RB43            | SSVDELNSKVNEMLSQGMYLWSPFVVPDYLNQTFFFQVSNVNFSSGGTDGKSAYQLW    | 65      |
| VibrioO395-1174 | -----                                                        | MIY 3   |
| VibrioO395-1257 | -----                                                        | MIY 3   |
| VibrioRC27      | -----                                                        | MIY 3   |
| VibrioTMA21     | -----                                                        | MIY 3   |
| VibrioTM11079   | -----                                                        | MIY 3   |
| VibrioTM2740    | -----                                                        | MIY 3   |
| VibrioI2129     | -----                                                        | MIY 3   |
| VirbiroSX-4     | -----                                                        | MIY 3   |

```

Flex2017B -----TTRKKSEVVYS-GVSVTIP--TAPTNLVSLKTL-TP 33
Flex2457 -----TTRKKSEVVYS-GVSVTIP--TAPTNLVSLKTL-TP 33
Flex301 -----TTRKKSEVVYS-GVSVTIP--TAPTNLVSLKTL-TP 33
FlexK-304 -----TTRKKSEVVYS-GVSVTIP--TAPTNLVSLKTL-TP 33
FlexK-671 -----TTRKKSEVVYS-GVSVTIP--TAPTNLVSLKTL-TP 33
Flex2930-71 -----TTRKKSEVVYS-GVSVTIP--TAPTNLVSLKTL-TP 33
Flex2747-71 -----TTRKKSEVVYS-GVSVTIP--TAPTNLVSLKTL-TP 33
E1520-1 -----TTRKKSEVVYS-GVSVTIP--TAPTNLVSLKTL-TP 33
B354-1 -----TTRKKSEVVYS-GVSVTIP--TAPTNLVSLKTL-TP 33
B7A1 -----TTRKKSEVVYS-GVSVTIP--TAPTNLVSLKTL-TP 33
Boyd-1 -----TTRKKSEVVYS-GVSVTIP--TAPTNLVSLKTL-TP 33
Ferg3 -----TTRKKSEVVYS-GVSVTIP--TAPTNLVSLKTL-TP 33
Flex2017 -----TTRKKSEVVYS-GVSVTIP--TAPTNLVSLKTL-TP 33
9570-1 -----TARKKSEVVYS-GVSVTIP--IAPTNLVSLKTL-TP 33
Dec12B -----TARKKSEVVYS-GVSVTIP--IAPTNLVSLKTL-TP 33
9574-1 -----TARKKSEVVYS-GVSVTIP--TAPTNLVSLKTL-TP 33
W-1 -----TTRKKSEVVYS-GVSVTIP--TAPTNLVILLKTL-TP 33
K011-1 -----TTRKKSEVVYS-GVSVTIP--TAPTNLVILLKTL-TP 33
H494-1 -----TTRKKSEVVYS-GVSVTIP--TAPTNLVSLKTL-TP 33
1632-1 -----TTRKKSEVVYS-GVSVTIP--TAPTNLVSLKTL-TP 33
B088-1 -----TTRKKSEVVYS-GVSVTIP--TAPTNLVSLKTL-TP 33
522-1 -----TTRKKSEVVYS-GVSVTIP--TAPTNLVSLKTL-TP 33
2534-1 -----TTRKKSEVVYS-GVSVTIP--TAPTNLVSLKTL-TP 33
FlexK-404 -----TTRKKSEVVYS-GVSVTIP--TAPTNLVSLKTL-TP 33
Eco82-1 -----TTRKKSEVVYS-GVSVTIP--TAPTNLVSLKTL-TP 33
UMNK-1 -----TTRKKSEVVYS-GVSVTIP--TAPTNLVSLKTL-TP 33
CUMT8 -----TTRKKSEVVYS-GVSVTIP--TAPTNLVSLKTF-TP 33
2741-1 -----TTRKKSEVVYS-GVSVTIP--TAPTNLVSLKTL-TP 33
LB22-1 -----TTRKKSEVVYS-GVSVTIP--TAPTNLVSLKTL-TP 33
2071-1 -----TTRKKSEVVYS-GVSVTIP--TAPTNLVSLKTL-TP 33
3493-1 -----TTRKKSEVVYS-GVSVTIP--TAPTNLVSLKTL-TP 33
7901-1 -----TTRKKSEVVYS-GVSVTIP--TAPTNLVSLKTL-TP 33
8351-1 -----TTRKKSEVVYS-GVSVTIP--TAPTNLVSLKTL-TP 33
C227-1 -----TTRKKSEVVYS-GVSVTIP--TAPTNLVSLKTL-TP 33
C236-1 -----TTRKKSEVVYS-GVSVTIP--TAPTNLVSLKTL-TP 33
9591-1 -----TTRKKSEVVYS-GVSVTIP--TAPTNLVSLKTL-TP 33
4404-1 -----TTRKKSEVVYS-GVSVTIP--TAPTNLVSLKTL-TP 33
4522-1 -----TTRKKSEVVYS-GVSVTIP--TAPTNLVSLKTL-TP 33
3677-1 -----TTRKKSEVVYS-GVSVTIP--TAPTNLVSLKTL-TP 33
4623-1 -----TTRKKSEVVYS-GVSVTIP--TAPTNLVSLKTL-TP 33
C1-1 -----TTRKKSEVVYS-GVSVTIP--TAPTNLVSLKTL-TP 33
C2-1 -----TTRKKSEVVYS-GVSVTIP--TAPTNLVSLKTL-TP 33
C3-1 -----TTRKKSEVVYS-GVSVTIP--TAPTNLVSLKTL-TP 33
C4-1 -----TTRKKSEVVYS-GVSVTIP--TAPTNLVSLKTL-TP 33
C5-1 -----TTRKKSEVVYS-GVSVTIP--TAPTNLVSLKTL-TP 33
Dec12D -----TTRKKSEVVYS-GVSVTIP--TAPTNLVSLKTL-TP 33
Sf6 -----TTRKKSEVVYS-GVSVTIP--TAPTNLVSLKTL-TP 33*
EC4113 -----TTRKKSEVVYS-GVSVTIP--TAPTNLVSLKTL-TP 33
STEC94C-1 -----TTRKKSEVVYS-GVSVTIP--TAPTNLVSLKTL-TP 33
Ferg2 -----TTRKKSEVVYS-GVSVTIP--TAPTNLVSLKTL-TP 33
TA271-1 -----TTRKKSEVVYS-GVSVTIP--TAPTNLVSLKTL-TP 33
Eco989-1 -----TTRKKSEVVYS-GVSVTIP--TAPTNLVSLKTL-TP 33
Ferg1 -----TTRKKSEVVYS-GVSVTIP--TAPTNLVSLKTL-TP 33
HS1 -----TTRKKSEVVYS-GVSVTIP--TAPTNLVSLKTL-TP 33*
M863-1 -----TTRKKSEVVYS-GVSVTIP--TAPTNLVSLKTL-TP 33
E1167-1 -----TTRKKSEVVYS-GVSVTIP--TAPTNLVSLKTL-TP 33
Dec10C-1 -----TTRKKSEVVYS-GVSVTIP--TAPTNLVSLKTL-TP 33
Dec10D-1 -----TTRKKSEVVYS-GVSVTIP--TAPTNLVSLKTL-TP 33
Dec10B-1 -----TTRKKSEVVYS-GVSVTIP--TAPTNLVSLKTL-TP 33
Dec9E-1 -----TTRKKSEVVYS-GVSVTIP--TAPTNLVSLKTL-TP 33
Dec9D-1 -----TTRKKSEVVYS-GVSVTIP--TAPTNLVSLKTL-TP 33
Dec9C-1 -----TTRKKSEVVYS-GVSVTIP--TAPTNLVSLKTL-TP 33
Dec9B-1 -----TTRKKSEVVYS-GVSVTIP--TAPTNLVSLKTL-TP 33
105-1 -----TTRKKSEVVYS-GVSVTIP--TAPTNLVSLKTL-TP 33
Dec9A-1 -----TTRKKSEVVYS-GVSVTIP--TAPTNLVSLKTL-TP 33
P18 -----TTRKKSEVVYS-GVSVTIP--TAPTNLVSLKTL-TP 33
30-1 -----TTRKKSEVVYS-GVSVTIP--TAPTNLVSLKTL-TP 33
9952 -----TTRKKSEVVYS-GVSVTIP--TAPTNLVSLKTL-TP 33
EC1865 -----TTRKKSEVVYS-GVSVTIP--TAPTNLVSLKTL-TP 33
1629-1 -----TTRKKSEVVYS-GVSVTIP--TAPTNLVSLKTL-TP 33
224-1 -----TTRKKSEVVYS-GVSVTIP--TAPTNLVSLKTL-TP 33
26-1 -----TTRKKSEVVYS-GVSVTIP--TAPTNLVSLKTL-TP 33
21-1 -----TTRKKSEVVYS-GVSVTIP--TAPTNLVSLKTL-TP 33
9942-1 -----TTRKKSEVVYS-GVSVTIP--TAPTNLVSLKTL-TP 33
Flex8401 -----TTRKKSEVVYS-GVSVTIP--TAPTNLVSLKTL-TP 33
FlexM90T -----TTRKKSEVVYS-GVSVTIP--TAPTNLVSLKTL-TP 33
phage31 -----TDSNGKMTTSLVSVSDLDLIKDRTRVKSELEWT-GLNIDVT--GTALNLVGALKAI-TP 176
44RR2-8torf183 -----TDSNGKMTTSLVSVSDLDLIKDRTRVKSELEWT-GLNIDVT--GTALNLVGALKAI-TP 176
CMB120orf226 -----MLQ-----THRIKTEVRFSGLSQLLTSGATGIDLLTVLDGK-TP 38
phiHS19 -----SPYLGNMMLQ-----THRIKTEVRFSGLSQLLTSGATGIDLLTVLDGK-TP 49
STML-13-1 -----MLQ-----THRIKTEVRFSGLSQLLTSGATGIDLLTVLDGK-TP 38
PhaxI -----SPYLGNMMLQ-----THRIKTEVRFSGLSQLLTSGATGIDLLTVLDGK-TP 49
Vi01 -----SPYLGNMMLQ-----THRIKTEVRFSGLSQLLTSGATGIDLLTVLDGK-TP 49
SFP10 -----SPYLGNMMLQ-----THRIKTEVRFSGLSQLLTSGATGIDLLTVLDGK-TP 49
Limestone1 -----SPYLGNMMLQ-----THRIKTEVRFSGLTAALPAGATGVDLLTLLDGK-TP 49
AeromonasSUU -----GKAFVYQAP-----KRKKTEVFWT-GLTGVVLTADTDYNLVTLKGLPAP 47
RB43 -----VEQPGNEGKTLDDFFDS----IAGVRKKSEVFWT-GLSLVIP-EDTPTNFNLIKGT-IP 118
Vibrio0395-1174 -----EAPLTSGSD-----AHHKSEVLPDFASPLVFTQGVTYNLIDRIKAA-AP 48
Vibrio0395-1257 -----EAPLTSGSD-----AHHKSEVLPDFASPLVFTQGVTYNLIDRIKAA-AP 48
VibrioRC27 -----EAPLTSGSD-----AHHKSEVLPDFASPLVFTQGVTYNLIDRIKAA-AP 48
VibrioTMA21 -----EAPLTSGSD-----APHHKSEVLPDFASPLVFTQGVTYNLIDRIKAA-AP 48
VibrioTM11079 -----EAPLTSGSD-----APHHKSEVLPDFASPLVFTQGVTYNLIDRIKAT-AP 48
VibrioTM2740 -----EAPLTSGSD-----APHHKSEVLPDFASPLVFTQGVTYNLIDRIKAT-AP 48
Vibrio12129 -----EAPLTSGSD-----APRRKSEVLPDFASPLVFTQGVTYNLIDRIKAT-VP 48
VirbriSX-4 -----EAPLIPVSD-----APRRKSEVLPDFASPLVFTQGVTYNLIDRIKAR-TP 48

```

```

* * * : : . . : . : : : . *
  | | |

```

```

Flex2017B      SSGS---LAPFFDTVNNKMVVF-NENKTLFFKLSIVGTWP-SGTANRSMQLTFS-GSVPD 87
Flex2457      SSGS---LAPFFDTVNNKMVVF-NENKTLFFKLSIVGTWP-SGTANRSMQLTFS-GSVPD 87
Flex301       SSGS---LAPFFDTVNNKMVVF-NENKTLFFKLSIVGTWP-SGTANRSMQLTFS-GSVPD 87
FlexK-304     SSGS---LAPFFDTVNNKMVVF-NENKTLFFKLSIVGTWP-SGTANRSMQLTFS-GSVPD 87
FlexK-671     SSGS---LAPFFDTVNNKMVVF-NENKTLFFKLSIVGTWP-SGTANRSMQLTFS-GSVPD 87
Flex2930-71  SSGS---LAPFFDTVNNKMVVF-NENKTLFFKLSIVGTWP-SGTANRSMQLTFS-GSVPD 87
Flex2747-71  SSGS---LAPFFDTVNNKMVVF-NENKTLFFKLSIVGTWP-SGTANRSMQLTFS-GSVPD 87
E1520-1      SSGS---LAPFFDTVNNKMVVF-NENKTLFFKLSIVGTWP-SGTANRSMQLTFS-GSVPD 87
B354-1       SSGS---LAPFFDTVNNKMVVF-NENKTLFFKLSIVGTWP-SGTANRSMQLTFS-GSVPD 87
B7A1         SSGS---LAPFFDTVNNKMVVF-NENKTLFFKLSIVGTWP-SGTANRSMQLTFS-GSVPD 87
Boyd-1       SSGS---LAPFFDTVNNKMVVF-NENKTLFFKLSIVGTWP-SGTANRSMQLTFS-GSVPD 87
Ferg3        SSGT---LAPFFDTVNNKMVVF-NENKTLFFKLSIVGTWP-SGTANRSMQLTFS-GSVPD 87
Flex2017     SSGT---LAPFFDTVNNKMVVF-NENKTLFFKLSIVGTWP-SGTANRSMQLTFS-GSVPD 87
9570-1       SSGT---LAPFFDTVNNKMVVF-NENKTLFFKLSIVGTWP-SGTANRSMQLTFS-GSVPD 87
Dec12B       SSGT---LAPFFDTVNNKMVVF-NENKTLFFKLSIVGTWP-SGTANRSMQLTFS-GSVPD 87
9574-1       SSGT---LAPFFDTVNNKMVVF-NENKTLFFKLSIVGTWP-SGTANRSMQLTFS-GSVPD 87
W-1          SSGT---LAPFFDTVNNKMVVF-NENKTLFFKLSIVGTWP-SGTANRSMQLTFS-GSVPD 87
K011-1       SSGT---LAPFFDTVNNKMVVF-NENKTLFFKLSIVGTWP-SGTANRSMQLTFS-GSVPD 87
H494-1       SSGT---LAPFFDTVNNKMVVF-NENKTLFFKLSIVGTWP-SGTANRSMQLTFS-GSVPD 87
1632-1       SSGT---LAPFFDTVNNKMVVF-NENKTLFFKLSIVGTWP-SGTANRSMQLTFS-GSVPD 87
B088-1       SSGT---LAPFFDTVNNKMVVF-NENKTLFFKLSIVGTWP-SGTANRSMQLTFS-GSVPD 87
522-1        SSGT---LAPFFDTVNNKMVVF-NENKTLFFKLSIVGTWP-SGTANRSMQLTFS-GSVPD 87
2534-1       SSGT---LAPFFDTVNNKMVVF-NENKTLFFKLSIVGTWP-SGTANRSMQLTFS-GSVPD 87
FlexK-404    SSGT---LAPFFDTVNNKMVVF-NENKTLFFKLSIVGTWP-SGTANRSMQLTFS-GSVPD 87
Eco82-1      SSGT---LAPFFDTVNNKMVVF-NENKTLFFKLSIVGTWP-SGTANRSMQLTFS-GSVPD 87
UMNK-1       SSGT---LAPFFDTVNNKMVVF-NENKTLFFKLSIVGTWP-SGTANRSMQLTFS-GSVPD 87
CUMT8        SSGT---LAPFFDTVNNKMVVF-NENKTLFFKLSIVGTWP-SGTANRSMQLTFS-GSVPD 87
2741-1       SSGT---LAPFFDTVNNKMVVF-NENKTLFFKLSIVGTWP-SGTANRSMQLTFS-GSVPD 87
LB22-1       SSGT---LAPFFDTVNNKMVVF-NENKTLFFKLSIVGTWP-SGTANRSMQLTFS-GSVPD 87
2071-1       SSGT---LAPFFDTVNNKMVVF-NENKTLFFKLSIVGTWP-SGTANRSMQLTFS-GSVPD 87
3493-1       SSGT---LAPFFDTVNNKMVVF-NENKTLFFKLSIVGTWP-SGTANRSMQLTFS-GSVPD 87
7901-1       SSGT---LAPFFDTVNNKMVVF-NENKTLFFKLSIVGTWP-SGTANRSMQLTFS-GSVPD 87
8351-1       SSGT---LAPFFDTVNNKMVVF-NENKTLFFKLSIVGTWP-SGTANRSMQLTFS-GSVPD 87
C227-1       SSGT---LAPFFDTVNNKMVVF-NENKTLFFKLSIVGTWP-SGTANRSMQLTFS-GSVPD 87
C236-1       SSGT---LAPFFDTVNNKMVVF-NENKTLFFKLSIVGTWP-SGTANRSMQLTFS-GSVPD 87
9591-1       SSGT---LAPFFDTVNNKMVVF-NENKTLFFKLSIVGTWP-SGTANRSMQLTFS-GSVPD 87
4404-1       SSGT---LAPFFDTVNNKMVVF-NENKTLFFKLSIVGTWP-SGTANRSMQLTFS-GSVPD 87
4522-1       SSGT---LAPFFDTVNNKMVVF-NENKTLFFKLSIVGTWP-SGTANRSMQLTFS-GSVPD 87
3677-1       SSGT---LAPFFDTVNNKMVVF-NENKTLFFKLSIVGTWP-SGTANRSMQLTFS-GSVPD 87
4623-1       SSGT---LAPFFDTVNNKMVVF-NENKTLFFKLSIVGTWP-SGTANRSMQLTFS-GSVPD 87
C1-1         SSGT---LAPFFDTVNNKMVVF-NENKTLFFKLSIVGTWP-SGTANRSMQLTFS-GSVPD 87
C2-1         SSGT---LAPFFDTVNNKMVVF-NENKTLFFKLSIVGTWP-SGTANRSMQLTFS-GSVPD 87
C3-1         SSGT---LAPFFDTVNNKMVVF-NENKTLFFKLSIVGTWP-SGTANRSMQLTFS-GSVPD 87
C4-1         SSGT---LAPFFDTVNNKMVVF-NENKTLFFKLSIVGTWP-SGTANRSMQLTFS-GSVPD 87
C5-1         SSGT---LAPFFDTVNNKMVVF-NENKTLFFKLSIVGTWP-SGTANRSMQLTFS-GSVPD 87
Dec12D       SSGT---LAPFFDTVNNKMVVF-NENKTLFFKLSIVGTWP-SGTANRSMQLTFS-GSVPD 87
Sf6          SSGT---LAPFFDTVNNKMVVF-NENKTLFFKLSIVGTWP-SGTANRSMQLTFS-GSVPD 87*
EC4113       SSGT---LAPFFDTVNNKMVVF-NENKTLFFKLSIVGTWP-SGTANRSMQLTFS-GSVPD 87
STEC94C-1   SSGT---LAPFFDTVNNKMVVF-NENKTLFFKLSIVGTWP-SGTANRSMQLTFS-GSVPD 87
Ferg2        SSGT---LAPFFDTVNNKMVVF-NENKTLFFKLSIVGTWP-SGTANRSMQLTFS-GSVPD 87
TA271-1     SSGT---LAPFFDTVNNKMVVF-NENKTLFFKLSIVGTWP-SGTANRSMQLTFS-GSVPD 87
Eco989-1    SSGT---LAPFFDTVNNKMVVF-NENKTLFFKLSIVGTWP-SGTANRSMQLTFS-GSVPD 87
Ferg1        SSGT---LAPFFDTVNNKMVVF-NENKTLFFKLSIVGTWP-SGTANRSMQLTFS-GSVPD 87
HS1          SSGT---LAPFFDTVNNKMVVF-NENKTLFFKLSIVGTWP-SGTANRSMQLTFS-GSVPD 87*
M863-1      SSGT---LAPFFDTVNNKMVVF-NENKTLFFKLSIVGTWP-SGTANRSMQLTFS-GSVPD 87
E1167-1     SSGT---LAPFFDTVNNKMVVF-NENKTLFFKLSIVGTWP-SGTANRSMQLTFS-GSVPD 87
Dec10C-1    SSGS---LAPFFDTVNNKMVVF-NENKTLFFKLSIVGTWP-SGTANRSMQLTFS-GSVPD 87
Dec10D-1    SSGS---LAPFFDTVNNKMVVF-NENKTLFFKLSIVGTWP-SGTANRSMQLTFS-GSVPD 87
Dec10B-1    SSGS---LAPFFDTVNNKMVVF-NENKTLFFKLSIVGTWP-SGTANRSMQLTFS-GSVPD 87
Dec9E-1     SSGS---LAPFFDTVNNKMVVF-NENKTLFFKLSIVGTWP-SGTANRSMQLTFS-GSVPD 87
Dec9D-1     SSGS---LAPFFDTVNNKMVVF-NENKTLFFKLSIVGTWP-SGTANRSMQLTFS-GSVPD 87
Dec9C-1     SSGS---LAPFFDTVNNKMVVF-NENKTLFFKLSIVGTWP-SGTANRSMQLTFS-GSVPD 87
Dec9B-1     SSGS---LAPFFDTVNNKMVVF-NENKTLFFKLSIVGTWP-SGTANRSMQLTFS-GSVPD 87
105-1       SSGS---LAPFFDTVNNKMVVF-NENKTLFFKLSIVGTWP-SGTANRSMQLTFS-GSVPD 87
Dec9A-1     SSGS---LAPFFDTVNNKMVVF-NENKTLFFKLSIVGTWP-SGTANRSMQLTFS-GSVPD 87
P18         SSGS---LAPFFDTVNNKMVVF-NENKTLFFKLSIVGTWP-SGTANRSMQLTFS-GSVPD 87
30-1        SSGS---LAPFFDTVNNKMVVF-NENKTLFFKLSIVGTWP-SGTANRSMQLTFS-GSVPD 87
9952        SSGS---LAPFFDTVNNKMVVF-NENKTLFFKLSIVGTWP-SGTANRSMQLTFS-GSVPD 87
EC1865      SSGS---LAPFFDTVNNKMVVF-NENKTLFFKLSIVGTWP-SGTANRSMQLTFS-GSVPD 87
1629-1      SSGS---LAPFFDTVNNKMVVF-NENKTLFFKLSIVGTWP-SGTANRSMQLTFS-GSVPD 87
224-1       SSGS---LAPFFDTVNNKMVVF-NENKTLFFKLSIVGTWP-SGTANRSMQLTFS-GSVPD 87
26-1        SSGS---LAPFFDTVNNKMVVF-NENKTLFFKLSIVGTWP-SGTANRSMQLTFS-GSVPD 87
21-1        SSGS---LAPFFDTVNNKMVVF-NENKTLFFKLSIVGTWP-SGTANRSMQLTFS-GSVPD 87
9942-1      SSGS---LAPFFDTVNNKMVVF-NENKTLFFKLSIVGTWP-SGTANRSMQLTFS-GSVPD 87
Flex8401     SSGS---LTPFFDTVNNKMVVF-NENKTLFFKLSIVGTWP-SGTANRSMQLTFS-GAVPD 87
FlexM90T     SSGS---LTPFFDTVNNKMVVF-NENKTLFFKLSIVGTWP-SGTANRSMQLTFS-GAVPD 87
phage31     VVGS---WAPMFDIINDKMVAANKDDRTLLYKIAITGTFD-NTSSNALTLLTTTIGSNI 232
44RR2-8torf183 VVGS---WAPMFDIINDKMVAANKDDRTLLYKIAITGTFD-NTSSNALTLLTTTIGSNI 232
CMB120orf226 NPSSPTGLAPFFKLSDHKPHAF-PYDSILPVKVINIGSWS-GSTSNRTMILDV-FSVGN 95
phiHS19     NPSSPTGLAPFFKLSDHKPHAF-PYDSILPVKVINIGSWS-GSTSNRTMILDV-FSVGN 106
STML-13-1  NPSSPTGLAPFFKLSDHKPHAF-PYDSILPVKVINIGSWS-GSTSNRTMILDV-FSVGN 95
PhaxI       NPSSPTGLAPFFKLSDHKPHAF-PYDSILPVKVINIGSWS-GSTSNRTMIVDFV-FSVGN 106
Vi01        NPSSPTGLAPFFKLSDHKPHAF-PYDSILPVKVINIGSWS-GSTSNRTMIVDFV-FSVGN 106
SFP10       NPSSPTGLAPFFKLSDHKPHAF-PYDSILPVKVINIGSWS-GSTSNRTMILDV-FSVGN 106
Limestone1  HPASVTLAPFFKLSDHKPHAF-PVDSILPVKVINIGTWS-GSTSNRTMLLDV-FSVGN 106
AeromonasSUU AFGT---LAPFFDTVNSKLNAY-NDNASLPKLNLAGTWS-AGTSNRSQLDV-FGTGN 101
RB43        TTGT---LEPFFKITDNKLPFF-NENSTLTFKLNKGTFTGATTAQRSVTLDFV-GTQCN 173
Vibrio0395-1174 IFGS---LLPFFDTAANLLRSF-NDDASLHFKANFIGSFP-GSAATRSLDLDL-FGTECN 102
Vibrio0395-1257 IFGS---LLPFFDTAANLLRSF-NDDASLHFKANFIGSFP-GSAATRSLDLDL-FGTECN 102
VibrioRC27  IFGS---LLPFFDTAANLLRSF-NDDASLHFKANFIGSFP-GSAATRSLDLDL-FGTECN 102
VibrioTMA21 IFGS---LLPFFDTAANLLRSF-NDDASLHFKANFIGSFP-GSAATRSLDLDL-FGTECN 102
VibrioTM1079 VFGS---LLPFFDTAANLLRSF-NDDASLHFKANFIGSFP-GSAATRSLDLDL-FGTECN 102
VibrioTM2740 VFGS---LLPFFDTAANLLRSF-NDDASLHFKANFIGSFP-GSAATRSLDLDL-FGTECN 102
VibrioI2129 VFGN---LLPFFDTAANLLRSF-NDDASLHFKANFIGSFP-GSAATRSLDLDL-FGTECN 102
Virbri0SX-4 VFGS---LLPFFDTAANLLRAP-NDNRSLYKANTGTTFP-GSAATRSLDLDL-FGTECN 102

```

```

..  *!* . . : : * * * : : : : : * :
  | | | | | | | | | | | | | | | | | |

```



```

Flex2017B -----
Flex2457 -----
Flex301 -----
FlexK-304 -----
FlexK-671 -----
Flex2930-71 -----
Flex2747-71 -----
E1520-1 -----
B354-1 -----
B7A1 -----
Boyd-1 -----
Ferg3 -----
Flex2017 -----
9570-1 -----
Dec12B -----
9574-1 -----
W-1 -----
K011-1 -----
H494-1 -----
1632-1 -----
B088-1 -----
522-1 -----
2534-1 -----
FlexK-404 -----
Eco82-1 -----
UMNK-1 -----
CUMT8 -----
2741-1 -----
LB22-1 -----
2071-1 -----
3493-1 -----
7901-1 -----
8351-1 -----
C227-1 -----
C236-1 -----
9591-1 -----
4404-1 -----
4522-1 -----
3677-1 -----
4623-1 -----
C1-1 -----
C2-1 -----
C3-1 -----
C4-1 -----
C5-1 -----
Dec12D -----
SF6 -----*
EC4113 -----
STEC94C-1 -----
Ferg2 -----
TA271-1 -----
Eco989-1 -----
Ferg1 -----
HS1 -----*
M863-1 -----
E1167-1 -----
Dec10C-1 -----
Dec10D-1 -----
Dec10B-1 -----
Dec9E-1 -----
Dec9D-1 -----
Dec9C-1 -----
Dec9B-1 -----
105-1 -----
Dec9A-1 -----
P18 -----
30-1 -----
9952 -----
EC1865 -----
1629-1 -----
224-1 -----
26-1 -----
21-1 -----
9942-1 -----
Flex8401 -----
FlexM90T -----
phage31 -----
44RR2-8torf183 -----
CMB120orf226 LYMTSI--- 161
phiHS19 LYMTSI--- 172
STML-13-1 LYMTSI--- 161
PhaxI LYMTSI--- 172
Vi01 LYMTSI--- 172
SFP10 LYMSSI--- 172
Limestone1 LYMNTI--- 172
AeromonasSUU QTQISAV-- 167
RB43 Q----- 233
VibrioO395-1174 STEILGGGA 170
VibrioO395-1257 STEILGGGA 170
VibrioRC27 STEILGGGA 170
VibrioTMA21 STEMLGGGA 170
VibrioTM11079 STEMLGGGA 170
VibrioTM2740 STEMLGGGA 170
Vibrio12129 STEILGGGA 170
VirbiroSX-4 STEMLGGGA 170

```

**Figure S3. Conserved residues in Sf6 tail needle knob-like proteins.**

The proteins shown in the figure S1 tree were aligned by Clustal W at the web site <http://www.ebi.ac.uk/Tools/msa/clustalw2/> [Larkin *et al.* (2007) Clustal W and Clustal X version 2.0. *Bioinformatics* 23: 2947-2948; asjens SR, Thuman-Commike PA (2011) Evolution of mosaically related tailed bacteriophage genomes seen through the lens of phage P22 virion assembly. *Virology* 411: 393-415]. The tail needle knob sequences containing only residues homologous to Sf6 amino acids 140 to 282 from P22-like phages are shown above with labels on the left in red text (Sf6 and HS1 are noted with an asterisk (\*) at the right end of those lines. The complete sequences of the extant homologues of this domain from outside the P22-like phage group are aligned below with labels in black text of the left. The consensus sequence is shown below with asterisks (\*) marking universally conserved amino acids, colons (:) marking amino acids with strongly similar properties - scoring  $> 0.5$  in the Gonnet PAM 250 matrix, and periods (.) marking amino acids with weakly similar properties - scoring  $\leq 0.5$  in the Gonnet PAM 250 matrix. In the bottom line red boxes indicate the universal conservation of the residues that contact the bound glutamate, green boxes indicate other universally conserved amino acids, and "P" marks amino acids that contact the phosphate ion on the 3-fold axis in Sf6.
