# Supplementary material for: The Tip of the Tail Needle Affects the Rate of DNA Delivery by Bacteriophage P22
Source: PubMed Central journal article supplement (PMC3741392; doi:10.1371/journal.pone.0070936), 2013-08-12
Supplement: pone.0070936.s005.pdf [file pone.0070936.s005.pdf]

**Table S1**  
**Oligonucleotides used in this study**

| Oligonucleotide <sup>a</sup> | Sequence (5' to 3')                                                            |
|------------------------------|--------------------------------------------------------------------------------|
| A                            | ACGAAGCTGGACAGGGTGCTTATGACGCACAGGTAAAAAATGATGTTAAGA<br>CCCACTTTCACATT          |
| B                            | ACCATTTCTATCAGGTCGATGTTGCGTGTTGGAGTGAATGTAATCCTAAGC<br>ACTTGTCTCCTG            |
| C                            | GGACAGGGTGCTTATGACGCACAGGTAAAAAATGATGAGCAGGATGTGATTT<br>CTCGCTGACCAT           |
| D                            | CATTTCTATCAGGTCGATGTTGCGTGTTGGAGTGAATGTAATCATTTACTG<br>CTCCGCGATTATC           |
| E                            | GGGTACGACTGCCGAGAACAATATTTTCGGCATTGCAGGCTGACTACGTAC<br>CTGTTGACAATTAATCATCCGCA |
| F                            | CAACCATTTCTATCAGGTCGATGTTGCGTGTTGGAGTGAATGTAATCATT<br>TCAGCACTGTCTGCTCCTT      |
| G                            | GACTGCCGAGAACAATATTTTCGGCATTGCAGGCTGACTACGCCACCACTCG<br>CAAGAAATCA             |
| H                            | CTATCAGGTCGATGTTGCGTGTTGGAGTGAATGTAATCATTTACTGCTCCGC<br>GATTATCT               |
| I                            | CATCGATGCTCTGGAGTATGCAACCACACGCAAGAAGTCATTAAGACCCAC<br>TTTCACATT               |
| J                            | GCGCTGTCGGGATGGTTACAGATACACCAGAGTAAACAACCTAAGCACTTG<br>TCTCCTG                 |
| K                            | GTGTTCAACGAGAACAACCCCTGTTCTTCTTAAGACCCACTTTTCACATT                             |
| L                            | CACTGGGCCACGTCCCAGACAATCGACAGCTAAGCACTTGCTCCTG                                 |
| M                            | GGCGACAACGACCGATAACATCCTGTTAGCTACGTTCTTCTAAGACCCAC<br>TTTCACATT                |
| N                            | TGGTTAACGTGCTGCCATTTGTGGCAAGAAAAGCCGCTTTTCTAAGCACTT<br>GTCTCCTG                |
| O                            | CCAACGAGGCCGGACAGGGCGCTTATGATGCACAGGTC                                         |
| P                            | GCTCCGCGATTATCTTGATGGTTGTGGCAGTAAACGACGC                                       |
| Q                            | ACGAAGCTGGACAGGGTGCTTATGACGCACAGGTAAAAAATGATGCCTGTT<br>GACAATTA                |
| R                            | ACCATTTCTATCAGGTCGATGTTGCGTGTTGGAGTGAATGTAATCTCAGCA<br>CTGTCCCTGCTCCTT         |
| S                            | GGCAGACCCGTCACCTTAATAATCC                                                      |
| T                            | TTGCGTGTTGGAGTGAATGTAATCATTAATCAATCAACCCATGTGCTTATA<br>AAAAGGTAGAAAAGCAATACC   |

- a. Oligonucleotides were synthesized by the University of Utah oligonucleotide core facility.
